# Supplementary material for: Synthesis of chiral fluorescence silver nano-clusters and study on the aggregation-induced emission enhancement and chiral flip
Source: Royal Society of Chemistry journal article supplement (doi:10.1039/c6ra22102e), 2016-01-01
Supplement: c6ra22102e1.pdf [file c6ra22102e1.pdf]

# Electronic Supplementary Information

## Synthesis of chiral fluorescence silver nano-clusters and study on the aggregation-induced emission enhancement and chiral flip

Cheng Huang, Yue Liu\*, Liping Wu and Huawen Zhao\*

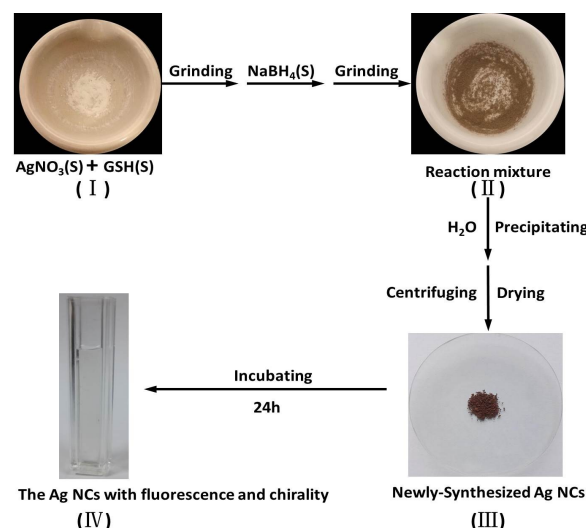

**Figure S1.** Schematic diagram of the synthesis process of Ag NCs.

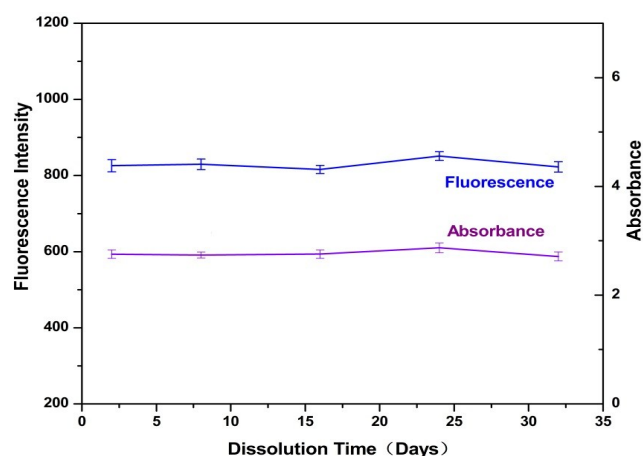

**Figure S2.** Fluorescence and UV absorption intensity of AgNCs at different storage time. Fluorescence emission was recorded at 440 nm with an excitation wavelength of 353 nm. Emission slit:4.0, AgNCs concentration:0.375mg.mL<sup>-1</sup>

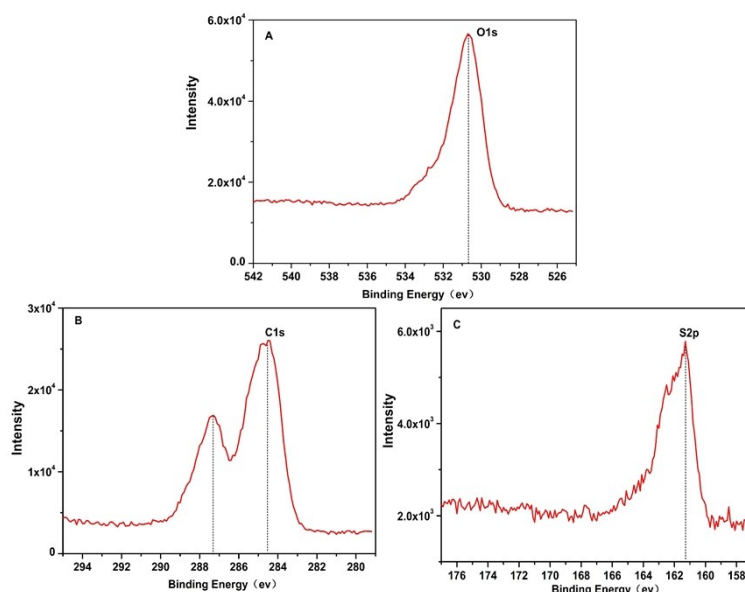

**Figure S3.** X-ray photoelectron spectroscopy (XPS) of AgNCs powder. A, B, C, represent O, C and S elements XPS energy Spectrum, respectively.

The peak at 530.68 corresponded to the binding energy of O1s (Fig. S2A).<sup>1, 2</sup> The spectra of C1s was composed of two peaks located at about 284.5 and 287.3 eV (see Fig. S2B), which could be attributed to the -C-C and -COO- structures, respectively.<sup>1, 3, 4</sup> The peak at 161.33eV was characteristic of S2p<sub>3/2</sub> (see Fig. S2C), but there was no free thiol value in the range of 164 eV, which suggested that GSH-Ag metal thiolates were formed.

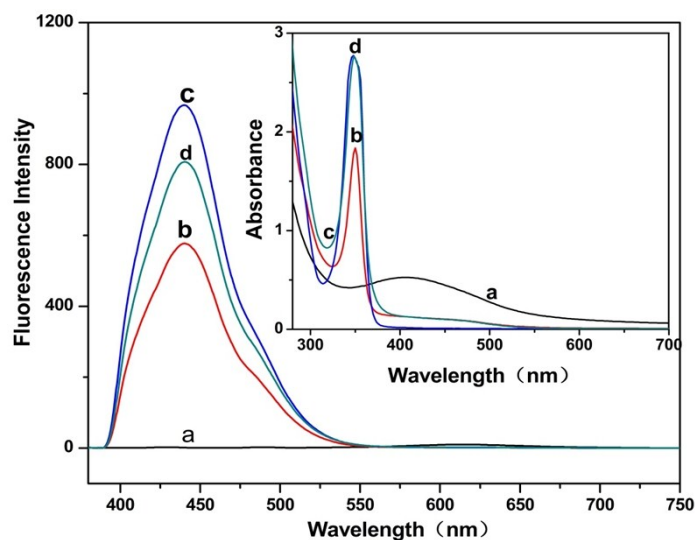

**Figure S4.** Fluorescence emission spectra of AgNCs under different GSH: AgNO<sub>3</sub>(R). GSH: AgNO<sub>3</sub>(R): 1:1(a), 2:1(b), 3:1(c), 4:1(d). Inset: UV absorption spectra of AgNCs. Fluorescence emission was recorded at 440 nm with an excitation wavelength of 353 nm. Emission slit: 4.0, AgNCs concentration: 0.375mg.mL<sup>-1</sup>.

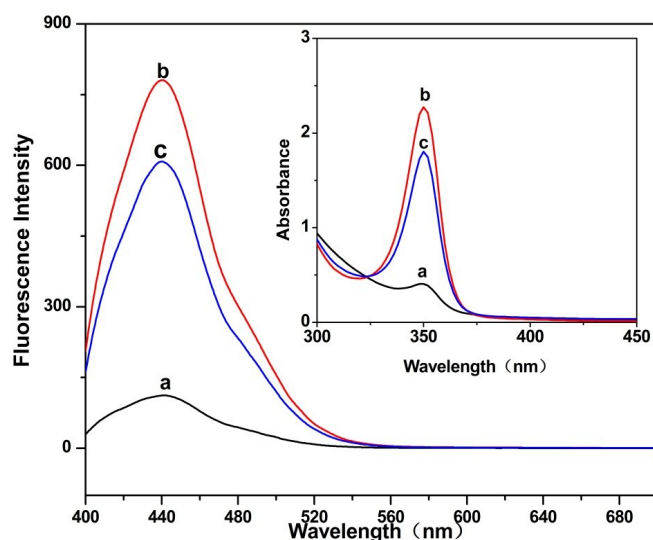

**Figure S5.** Effect of temperature on the synthesis of AgNCs. Temperature: 20°C(a), 27°C(b) and 30°C(c). Inset for the corresponding UV absorption spectra. Fluorescence emission was recorded at 440 nm with an excitation wavelength of 353 nm. Emission slit: 4.0, AgNCs concentration: 0.375 mg mL<sup>-1</sup>.

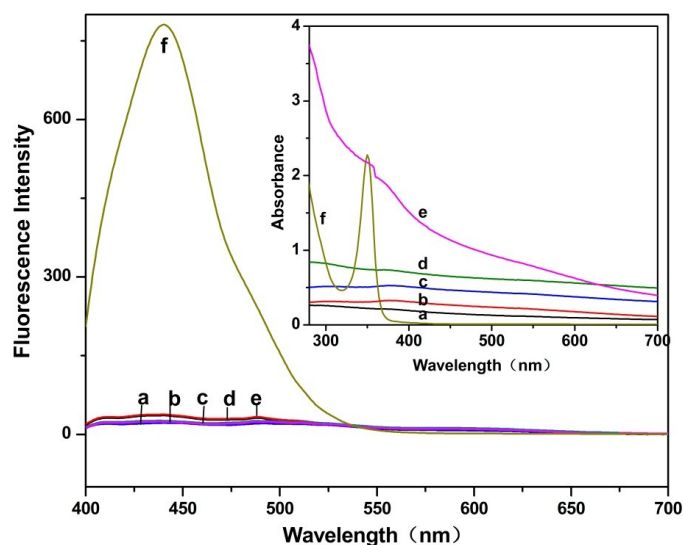

**Figure S6.** The effect of solvents on the synthesis of AgNCs. a-f represent with petroleum ether (0.01), n-butanol (3.7), ethanol (4.3), ethylene (6.9), dimethyl sulfoxide (7.2) and water (10.2) dissolve AgNCs, solvent polarity values are shown in brackets. Inset: UV absorption spectra of AgNCs. Fluorescence emission was recorded at 440 nm with an excitation wavelength of 353 nm. Emission slit: 4.0, AgNCs concentration: 0.375 mg mL<sup>-1</sup>.

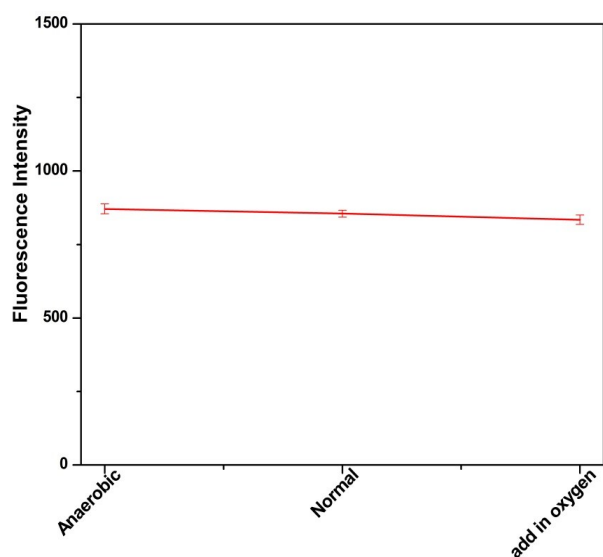

**Figure S7.** Fluorescence intensity of AgNCs with different oxygen content. Anaerobic Group: 100mL ultrapure water continued to add in  $N_2$  for 5min. Normal group: did not do any treatment. Add oxygen group: 100mL ultrapure water continued to add in  $O_2$  for 5min. Fluorescence emission was recorded at 440 nm with an excitation wavelength of 353 nm. Emission slit: 4.0, AgNCs concentration:  $0.375\text{mg}\cdot\text{mL}^{-1}$ .

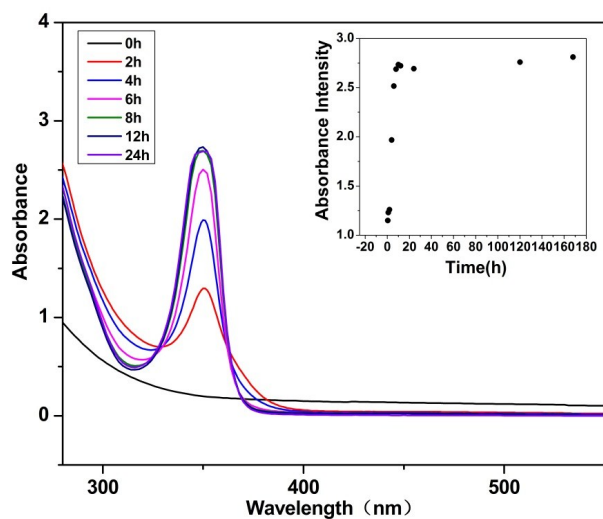

**Figure S8.** The influence of incubation time for AgNCs optical properties. Inset: the absorbance (350nm) intensity dependent upon incubation time. AgNCs ( $3\text{mg}/\text{mL}$ ) is incubation under ambient conditions, samples ( $0.5\text{mL}$ ) were taken measured was diluted to  $0.375\text{mg}/\text{mL}$ .

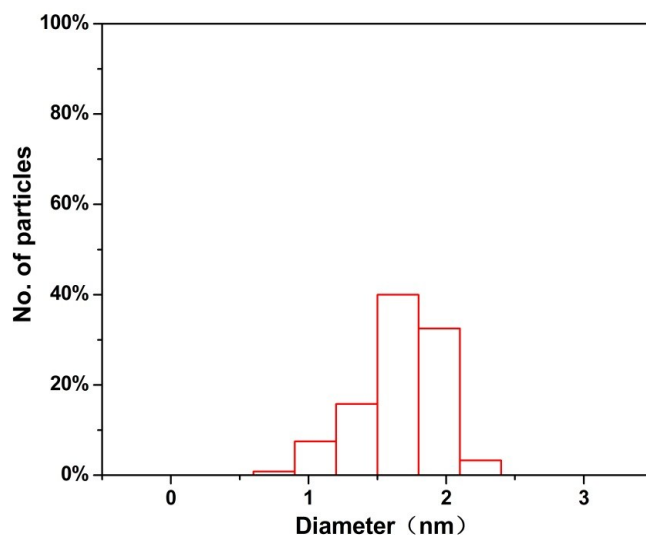

**Figure S9.** The size distribution corresponding to HR-TEM(0h) image of AgNCs. AgNCs (0.375mg/mL, 0h) solution drops to the ultra-thin carbon film preparation sample. After the ultra-thin film was naturally dried, the samples were measured HR-TEM.

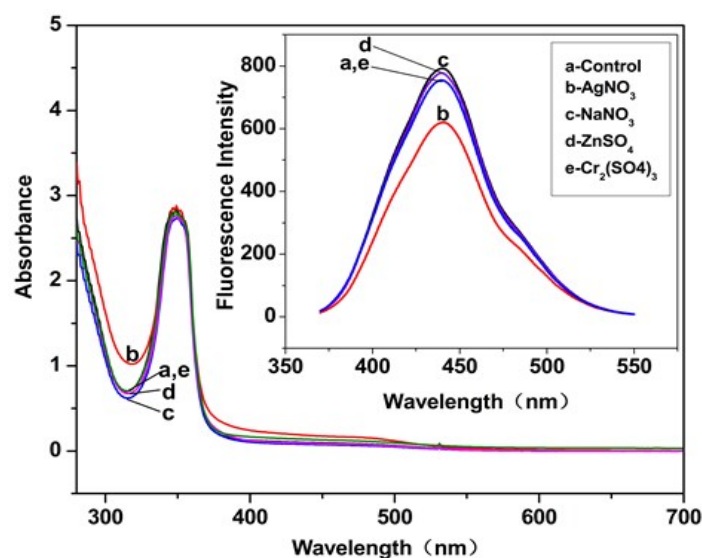

**Figure S10.** Effect of cations (such as Ag<sup>+</sup>(b), Na<sup>+</sup>(c), Zn<sup>2+</sup>(d) and Cr<sup>3+</sup>(e)) on the fluorescence intensity of AgNCs. Aqueous solution (pH=5.0) containing metal cations dissolved AgNCs powder after 24h were detected by fluorescence and UV. Fluorescence emission was recorded at 440 nm (Emission slit: 4.0) with an excitation wavelength of 353 nm. Guarantee the same ion concentration (1mM) and AgNCs concentration (0.375mg.mL<sup>-1</sup>).

**Table S1.** Assignments of peaks in XPS

| Name | Start<br>BE | Peak<br>BE | End<br>BE | Height<br>CPS | FWHM<br>eV | Area(P) CPS.eV | Area(N)KE <sup>0.6</sup> | At. % |
|------|-------------|------------|-----------|---------------|------------|----------------|--------------------------|-------|
| S2p  | 167.1       | 161.3      | 159.1     | 3686.3        | 1.0        | 9473.7         | 0.1                      | 12.5  |
| Ag3d | 377         | 367.6      | 364.3     | 41993.3       | 1.3        | 104174.6       | 0.1                      | 13.2  |

## References

- 1 S. Fischer, A. C. Papageorgiou, M. Marschall, J. Reichert, J. V. Gartht, K. Diller, F. Klappenberger, F. Allegretti, A. Nefedov and C. Woll, *J. Phys. Chem. C*, 2012, **116**, 20356-20362.
- 2 W. C. D, R. W. M, D. L. E and E. Al., *Handbook of X-Ray Photoelectron Spectrometer*, Minnesota: Perkin-Elmer, 1979.
- 3 J. Xiang, H. Cao, Q. Wu, S. Zhang, X. Zhang and A. A. R. Watt, *The Journal of Physical Chemistry C*, 2008, **112**, 3580-3584.
- 4 H. Kim, S. Choi and H. Park, *Radiat. Phys. Chem.*, 2012, **81**, 1612-1620.
